# Supplementary material
Source: publisher figshare collection journal article supplement (https://gsapubs.figshare.com/articles/dataset/_/12532628)
Supplement: Supplementary file 1 [file 1]

## Sheet: Hidden Data
Double Line Plot Age Plateau			Double Line Plot K/Ca Plateau			X-Y Plot Normal Isochron		X-Y Plot Inverse Isochron		Error Ellipses Normal Isochron		Error Ellipses Inverse Isochron
Ar39k%	Line 1	Line 2	Ar39k%	Line 1	Line 2	X-axis	Y-axis	X-axis	Y-axis	X-axis	Y-axis	X-axis	Y-axis
0	143.266	210.362	0	0.00148226	0.00331279	1.04774	331.812	0.00315765	0.00301376			0.00331402	0.00301379
1.72675	143.266	210.362	1.72675	0.00148226	0.00331279	48.8834	1077.56	0.0453651	0.000928026			0.00330869	0.00299552
1.72675	88.7114	78.8475	1.72675	0.0101548	0.00647655	893.205	12690.8	0.0703822	7.87974e-05			0.00329308	0.00297848
8.50431	88.7114	78.8475	8.50431	0.0101548	0.00647655	3566.65	49560.7	0.0719653	2.01773e-05			0.00326823	0.00296385
8.50431	70.8965	74.8896	8.50431	0.0154777	0.0237283	71.7115	1282.68	0.0559076	0.000779617			0.00323585	0.00295262
37.1495	70.8965	74.8896	37.1495	0.0154777	0.0237283	86.684	1497.31	0.057893	0.000667862			0.00319813	0.00294556
37.1495	76.5318	68.5894	37.1495	0.0221729	0.0113617	9.56666	426.683	0.022421	0.00234366			0.00315766	0.00294314
65.7649	76.5318	68.5894	65.7649	0.0221729	0.0113617	6.55082	389.357	0.0168247	0.00256834			0.00311719	0.00294554
65.7649	67.4383	77.2016	65.7649	0.00648271	0.0101142	2.62224	332.608	0.00788389	0.00300655			0.00307948	0.00295259
80.2162	67.4383	77.2016	80.2162	0.00648271	0.0101142	2.00112	324.011	0.00617608	0.00308631			0.00304709	0.0029638
80.2162	81.5223	64.13	80.2162	0.00541795	0.0035776	0.944813	309.001	0.00305764	0.00323624			0.00302224	0.00297842
86.6245	81.5223	64.13	86.6245	0.00541795	0.0035776	0.601892	303.966	0.00198013	0.00328984			0.00300661	0.00299545
86.6245	60.7449	83.3436	86.6245	0.00289843	0.00441287	0.427755	303.031	0.00141159	0.0033			0.00300128	0.00301372
91.0674	60.7449	83.3436	91.0674	0.00289843	0.00441287	0.139997	301.978	0.000463599	0.0033115			0.0030066	0.003032
91.0674	93.469	56.95	91.0674	0.00498964	0.00258513							0.00302222	0.00304904
92.9437	93.469	56.95	92.9437	0.00498964	0.00258513							0.00304707	0.00306367
92.9437	52.3424	96.2617	92.9437	0.00224427	0.00586431							0.00307945	0.0030749
94.2744	52.3424	96.2617	94.2744	0.00224427	0.00586431							0.00311716	0.00308196
94.2744	93.0891	56.5089	94.2744	0.0120319	0.00294799							0.00315763	0.00308437
96.2106	93.0891	56.5089	96.2106	0.0120319	0.00294799							0.0031981	0.00308198
96.2106	43.5594	106.467	96.2106	-0.0100171	0.0384869							0.00323582	0.00307493
97.3111	43.5594	106.467	97.3111	-0.0100171	0.0384869							0.00326821	0.00306371
97.3111	140.927	6.79924	97.3111	0.0259483	-0.010829							0.00329306	0.00304909
98.761	140.927	6.79924	98.761	0.0259483	-0.010829							0.00330869	0.00303207
98.761	-118.075	302.037	98.761	-0.0119621	0.0416447							0.00331402	0.00301379
99.4879	-118.075	302.037	99.4879	-0.0119621	0.0416447
99.4879	621.138	-156.35	99.4879	15.33	-14.6871							0.0458475	0.000928139
100	621.138	-156.35	100	15.33	-14.6871							0.045831	0.000890454
												0.0457828	0.000855329
0	0.00148226	0.00331279										0.0457062	0.000825159
1.72675	0.00148226	0.00331279										0.0456063	0.000801999
1.72675	0.0101548	0.00647655										0.0454899	0.000787427
8.50431	0.0101548	0.00647655										0.0453651	0.000782437
8.50431	0.0154777	0.0237283										0.0452402	0.000787369
37.1495	0.0154777	0.0237283										0.0451239	0.000801886
37.1495	0.0221729	0.0113617										0.045024	0.000824999
65.7649	0.0221729	0.0113617										0.0449473	0.000855133
65.7649	0.00648271	0.0101142										0.0448991	0.000890235
80.2162	0.00648271	0.0101142										0.0448827	0.000927913
80.2162	0.00541795	0.0035776										0.0448991	0.000965598
86.6245	0.00541795	0.0035776										0.0449473	0.00100072
86.6245	0.00289843	0.00441287										0.0450239	0.00103089
91.0674	0.00289843	0.00441287										0.0451238	0.00105405
91.0674	0.00498964	0.00258513										0.0452402	0.00106862
92.9437	0.00498964	0.00258513										0.045365	0.00107361
92.9437	0.00224427	0.00586431										0.0454899	0.00106868
94.2744	0.00224427	0.00586431										0.0456062	0.00105417
94.2744	0.0120319	0.00294799										0.0457061	0.00103105
96.2106	0.0120319	0.00294799										0.0457828	0.00100092
96.2106	-0.0100171	0.0384869										0.045831	0.000965816
97.3111	-0.0100171	0.0384869										0.0458475	0.000928139
97.3111	0.0259483	-0.010829
98.761	0.0259483	-0.010829										0.0708151	7.88688e-05
98.761	-0.0119621	0.0416447										0.0708004	5.5549e-05
99.4879	-0.0119621	0.0416447										0.0707571	3.38135e-05
99.4879	15.33	-14.6871										0.0706883	1.51436e-05
100	15.33	-14.6871										0.0705987	8.11653e-07
												0.0704943	-8.20574e-06
												0.0703822	-1.1294e-05
												0.0702702	-8.24271e-06
												0.0701657	7.40232e-07
												0.0700761	1.50426e-05
												0.0700073	3.36898e-05
												0.069964	5.5411e-05
												0.0699493	7.8726e-05
												0.069964	0.000102046
												0.0700072	0.000123781
												0.070076	0.000142451
												0.0701657	0.000156783
												0.0702701	0.000165801
												0.0703822	0.000168889
												0.0704942	0.000165838
												0.0705987	0.000156855
												0.0706883	0.000142552
												0.0707571	0.000123905
												0.0708004	0.000102184
												0.0708151	7.88689e-05
												0.0736999	2.06232e-05
												0.0736408	-2.31893e-05
												0.0734675	-6.40464e-05
												0.0731919	-9.91638e-05
												0.0728326	-0.000126148
												0.0724143	-0.000143161
												0.0719653	-0.000149042
												0.0715164	-0.000143392
												0.071098	-0.000126594
												0.0707388	-9.97945e-05
												0.0704631	-6.48188e-05
												0.0702898	-2.40508e-05
												0.0702307	1.97313e-05
												0.0702898	6.35437e-05
												0.070463	0.000104401
												0.0707387	0.000139518
												0.0710979	0.000166503
												0.0715163	0.000183515
												0.0719653	0.000189397
												0.0724142	0.000183746
												0.0728326	0.000166949
												0.0731918	0.000140149
												0.0734675	0.000105173
												0.0736408	6.44054e-05
												0.0736999	2.06233e-05
												0.0566181	0.000782837
												0.0565941	0.000737266
												0.0565233	0.000694581
												0.0564105	0.000657691
												0.0562635	0.00062911
												0.0560922	0.000610786
												0.0559084	0.000603967
												0.0557244	0.000609119
												0.055553	0.00062589
												0.0554057	0.000653137
												0.0552926	0.000689003
												0.0552214	0.000731045
												0.055197	0.000776397
												0.055221	0.000821968
												0.0552918	0.000864654
												0.0554046	0.000901544
												0.0555516	0.000930125
												0.0557229	0.000948449
												0.0559068	0.000955267
												0.0560907	0.000950116
												0.0562621	0.000933345
												0.0564094	0.000906098
												0.0565225	0.000870231
												0.0565937	0.000828189
												0.0566181	0.000782837
												0.05932	0.0006773
												0.059272	0.000593616
												0.0591299	0.000514991
												0.0589036	0.000446784
												0.0586083	0.000393644
												0.0582644	0.000359191
												0.0578951	0.000345773
												0.0575257	0.000354305
												0.0571813	0.000384206
												0.0568854	0.000433437
												0.0566582	0.000498644
												0.0565151	0.000575383
												0.0564659	0.000658424
												0.056514	0.000742109
												0.056656	0.000820733
												0.0568824	0.00088894
												0.0571776	0.000942081
												0.0575216	0.000976534
												0.0578908	0.000989951
												0.0582603	0.000981419
												0.0586047	0.000951519
												0.0589006	0.000902287
												0.0591278	0.000837081
												0.0592709	0.000760342
												0.05932	0.0006773
												0.0229405	0.00235544
												0.0229238	0.00231298
												0.0228727	0.00227261
												0.022791	0.00223709
												0.022684	0.00220882
												0.022559	0.00218975
												0.0224247	0.00218116
												0.0222901	0.00218365
												0.0221645	0.00219705
												0.0220563	0.00222043
												0.021973	0.00225221
												0.0219202	0.00229023
												0.0219016	0.00233189
												0.0219183	0.00237434
												0.0219693	0.00241471
												0.0220511	0.00245024
												0.0221581	0.0024785
												0.022283	0.00249758
												0.0224173	0.00250616
												0.0225519	0.00250367
												0.0226776	0.00249028
												0.0227857	0.00246689
												0.0228691	0.00243511
												0.0229218	0.0023971
												0.0229405	0.00235544
												0.017439	0.00259453
												0.0174202	0.0025433
												0.0173608	0.00249377
												0.0172649	0.00244933
												0.017139	0.002413
												0.0169917	0.00238725
												0.016833	0.00237385
												0.0166737	0.00237369
												0.0165247	0.00238681
												0.0163962	0.00241229
												0.0162968	0.00244841
												0.0162335	0.0024927
												0.0162104	0.00254214
												0.0162292	0.00259337
												0.0162885	0.0026429
												0.0163844	0.00268734
												0.0165104	0.00272367
												0.0166577	0.00274942
												0.0168164	0.00276282
												0.0169757	0.00276298
												0.0171247	0.00274986
												0.0172532	0.00272438
												0.0173526	0.00268826
												0.0174159	0.00264397
												0.017439	0.00259453
												0.00819587	0.00301036
												0.00818559	0.00298127
												0.00815475	0.0029539
												0.00810546	0.00293013
												0.00804106	0.00291156
												0.00796595	0.00289946
												0.00788525	0.00289466
												0.00780446	0.00289749
												0.00772908	0.00290774
												0.00766425	0.00292474
												0.00761439	0.0029473
												0.00758289	0.00297391
												0.00757191	0.00300273
												0.00758218	0.00303182
												0.00761302	0.00305919
												0.00766232	0.00308296
												0.00772671	0.00310153
												0.00780182	0.00311363
												0.00788252	0.00311843
												0.00796331	0.0031156
												0.00803869	0.00310535
												0.00810352	0.00308836
												0.00815339	0.00306579
												0.00818488	0.00303919
												0.00819587	0.00301036
												0.00635421	0.00308777
												0.0063483	0.00306887
												0.00633065	0.00305116
												0.00630246	0.00303584
												0.00626567	0.00302396
												0.00622276	0.00301633
												0.00617668	0.00301347
												0.00613056	0.00301558
												0.00608754	0.0030225
												0.00605055	0.00303377
												0.00602212	0.00304862
												0.00600418	0.00306605
												0.00599795	0.00308485
												0.00600387	0.00310375
												0.00602152	0.00312146
												0.0060497	0.00313678
												0.0060865	0.00314866
												0.0061294	0.00315629
												0.00617548	0.00315915
												0.00622161	0.00315705
												0.00626463	0.00315012
												0.00630162	0.00313885
												0.00633005	0.003124
												0.00634799	0.00310658
												0.00635421	0.00308777
												0.00318562	0.00323702
												0.00318136	0.00322099
												0.00316867	0.003206
												0.00314841	0.00319306
												0.00312196	0.00318307
												0.00309113	0.00317671
												0.00305802	0.0031744
												0.00302488	0.0031763
												0.00299397	0.00318229
												0.00296741	0.00319195
												0.00294699	0.00320464
												0.00293411	0.00321947
												0.00292965	0.00323545
												0.00293392	0.00325149
												0.00294661	0.00326648
												0.00296687	0.00327941
												0.00299332	0.0032894
												0.00302415	0.00329577
												0.00305726	0.00329808
												0.0030904	0.00329617
												0.0031213	0.00329019
												0.00314787	0.00328052
												0.00316829	0.00326784
												0.00318116	0.003253
												0.00318562	0.00323702
												0.00217375	0.00329017
												0.00216719	0.0032679
												0.00214788	0.00324712
												0.00211714	0.00322925
												0.00207707	0.00321551
												0.00203038	0.00320684
												0.00198027	0.00320383
												0.00193016	0.00320667
												0.00188344	0.00321519
												0.00184332	0.00322879
												0.00181252	0.00324655
												0.00179314	0.00326726
												0.00178651	0.00328951
												0.00179307	0.00331179
												0.00181238	0.00333256
												0.00184311	0.00335043
												0.00188319	0.00336417
												0.00192987	0.00337284
												0.00197998	0.00337585
												0.0020301	0.00337301
												0.00207681	0.0033645
												0.00211694	0.00335089
												0.00214774	0.00333313
												0.00216711	0.00331242
												0.00217375	0.00329017
												0.00145124	0.00349404
												0.00146669	0.003484
												0.00147839	0.00346141
												0.00148554	0.00342783
												0.00148765	0.00338553
												0.00148457	0.0033374
												0.00147652	0.00328673
												0.00146405	0.00323696
												0.001448	0.00319148
												0.00142947	0.0031534
												0.00140972	0.00312532
												0.0013901	0.00310913
												0.00137194	0.00310595
												0.00135648	0.003116
												0.00134478	0.00313858
												0.00133764	0.00317217
												0.00133553	0.00321447
												0.00133861	0.00326259
												0.00134666	0.00331326
												0.00135913	0.00336304
												0.00137518	0.00340851
												0.00139371	0.00344659
												0.00141346	0.00347468
												0.00143308	0.00349086
												0.00145124	0.00349404
												0.000667319	0.00331533
												0.000660981	0.00328305
												0.000641191	0.00325272
												0.000609299	0.00322639
												0.000567478	0.00320587
												0.000518577	0.00319254
												0.00046593	0.00318731
												0.000413124	0.00319056
												0.000363758	0.00320204
												0.000321195	0.00322098
												0.000288338	0.0032461
												0.000267424	0.00327566
												0.000259878	0.00330768
												0.000266217	0.00333995
												0.000286006	0.00337028
												0.000317898	0.00339661
												0.000359719	0.00341714
												0.00040862	0.00343047
												0.000461267	0.00343569
												0.000514073	0.00343245
												0.000563439	0.00342096
												0.000606002	0.00340202
												0.00063886	0.00337691
												0.000659774	0.00334734
												0.000667319	0.00331533

## Sheet: Incremental Heating Summary
	Incremental Heating			36Ar(a)	37Ar(ca)	38Ar(cl)	39Ar(k)	40Ar(r)	Age	± 2s	40Ar(r)	39Ar(k)	K/Ca	± 2s
									(Ma)		(%)	(%)
	12M0396B	1.25		0.0336935	6.33149	0.000885242	0.0353021	1.22346	176.814	33.548	10.9434	1.72675	0.00239753	0.000915266
	12M0396C	1.5		0.00283455	7.16501	0.000475092	0.138563	2.21678	83.7795	4.93199	72.5708	6.77756	0.00831568	0.00183913
	12M0396D	2	4	0.000655651	12.846	0.000867032	0.585631	8.12698	72.893	1.99653	97.659	28.6452	0.019603	0.00412529
	12M0396E	2.5	4	0.000164026	15.003	0.00127252	0.585023	8.08077	72.5606	3.97123	99.3907	28.6155	0.0167673	0.00540559
	12M0396F	3	4	0.00411993	15.3091	0.00130503	0.295446	4.06711	72.3199	4.88165	76.9544	14.4513	0.00829845	0.00181575
	12M0397B	3.5	4	0.0015114	12.5253	0.00109039	0.131014	1.81642	72.8262	8.69618	80.2562	6.40834	0.00449778	0.000920176
	12M0397C	4.5	4	0.00949452	10.6841	0.000921254	0.0908309	1.24552	72.0443	11.2993	30.7435	4.44285	0.00365565	0.000757222
	12M0397D	5.5	4	0.00585587	4.35527	0.000413935	0.0383607	0.549616	75.2095	18.2595	24.105	1.87635	0.00378739	0.00120226
	12M0397F	7	4	0.0103743	2.88525	0.000195802	0.0272038	0.384964	74.302	21.9596	11.1564	1.33063	0.00405429	0.00181002
	12M0397G	8.5	4	0.0197812	2.27257	0.000183045	0.0395846	0.563991	74.799	18.2901	8.79942	1.93622	0.00748993	0.00454194
	12M0397H	10	4	0.0238137	0.679651	1.94678e-05	0.0224995	0.321505	75.0134	31.454	4.36917	1.10052	0.0142349	0.024252
	12M0397J	13	4	0.0492468	1.68603	0.000191613	0.0296413	0.416927	73.863	67.0638	2.7852	1.44985	0.00755961	0.0183886
	12M0398B	16	4	0.0347418	0.43057	1.40054e-06	0.014861	0.261626	91.9813	210.056	2.48508	0.726899	0.0148413	0.0268034
	12M0398C	20		0.0747892	0	0.000629239	0.0104702	0.484472	232.394	388.744	2.14513	0.512134	0.321452	15.0086
			S	0.271076	92.1734	0.00845106	2.04443	29.7601
	Information on Analysis				Results		40(r)/39(k)	± 2s	Age	± 2s	MSWD	39Ar(k)	K/Ca	± 2s
									(Ma)			(%,n)
	Sample = VU91-G2				Age Plateau		13.86	0.312393	72.8042	1.62246	0.0269607	90.9836	0.0046235	0.00152094
	Material = Groundmass (300-200)							0.0225391		0.0222852		11
	Location = SO84 86DS-3				Minimal External Error					2.18003	2.22814	Statistical T Ratio
	Analyst = John OConnor				Analytical Error					1.60827	1	Error Magnification
	Project = VU91-WALVIS
	Mass Discrimination Law = LIN				Total Fusion Age		14.5567	0.655957	76.3871	3.37778		14	0.00953751	0.00117394
	Irradiation = VU91							0.0450622		0.0442192
	J = 0.00297118 ± 0.00000446				Minimal External Error					3.7072
	FC = 25.260 ± 0.020 Ma				Analytical Error					3.37032

## Sheet: Normal Isochron Table
	Normal Isochron			39(k)/36(a)	± 2s	40(a+r)/36(a)	± 2s			r.i.
	12M0396B	1.25		1.04774	0.0573915	331.812	7.77451			0.427405
	12M0396C	1.5		48.8834	7.68607	1077.56	169.047			0.99771
	12M0396D	2	4	893.205	1021.24	12690.8	14509.7			0.999986
	12M0396E	2.5	4	3566.65	29912.3	49560.7	415650			0.999996
	12M0396F	3	4	71.7115	16.1696	1282.68	289.04			0.998411
	12M0397B	3.5	4	86.684	41.8181	1497.31	722.418			0.998695
	12M0397C	4.5	4	9.56666	0.687162	426.683	29.6617			0.946781
	12M0397D	5.5	4	6.55082	0.528212	389.357	29.7504			0.893237
	12M0397F	7	4	2.62224	0.140357	332.608	12.3848			0.673719
	12M0397G	8.5	4	2.00112	0.0739688	324.011	7.64836			0.625557
	12M0397H	10	4	0.944813	0.0433146	309.001	5.90516			0.407982
	12M0397J	13	4	0.601892	0.0608752	303.966	7.94734			0.255548
	12M0398B	16		0.427755	0.0251079	303.031	17.8602			0.580152
	12M0398C	20		0.139997	0.0616455	301.978	11.33			0.0659009
	Results			40(a)/36(a)	± 2s	40(r)/39(k)	± 2s	Age	± 2s	MSWD
								(Ma)
	Normal Isochron Error Chron			301.147	13.4422	13.8146	0.0113574	72.5704	0.221258	> 100
					0.0446366		0.000822128		0.00304888
	Minimal External Error								1.46818
	Analytical Error								0.0584781
	Statistics			Statistical F ratio	1.93842		Convergence	2.55131e-07
				Error Magnification	> 10		Number of Iterations	3
				Number of Data Points	10		Calculated Line	Unweighted York-2

## Sheet: Inverse Isochron Table
	Inverse Isochron			39(k)/40(a+r)	± 2s	36(a)/40(a+r)	± 2s			r.i.
	12M0396B	1.25		0.00315765	0.00015637	0.00301376	7.06139e-05			0.000381068
	12M0396C	1.5		0.0453651	0.000482397	0.000928026	0.000145589			0.000706075
	12M0396D	2	4	0.0703822	0.000432943	7.87974e-05	9.00914e-05			0.000758222
	12M0396E	2.5	4	0.0719653	0.00173463	2.01773e-05	0.00016922			0.00261007
	12M0396F	3	4	0.0559076	0.000710534	0.000779617	0.00017568			0.0172089
	12M0397B	3.5	4	0.057893	0.00142706	0.000667862	0.000322227			0.0277973
	12M0397C	4.5	4	0.022421	0.000519484	0.00234366	0.000162925			0.0652112
	12M0397D	5.5	4	0.0168247	0.000614365	0.00256834	0.000196244			0.120076
	12M0397F	7	4	0.00788389	0.000311983	0.00300655	0.00011195			0.0296703
	12M0397G	8.5	4	0.00617608	0.000178132	0.00308631	7.2853e-05			0.0167222
	12M0397H	10	4	0.00305764	0.000127986	0.00323624	6.18461e-05			0.00971743
	12M0397J	13	4	0.00198013	0.000193621	0.00328984	8.60144e-05			0.00306196
	12M0398B	16		0.00141159	7.60819e-05	0.0033	0.000194497			0.461715
	12M0398C	20		0.000463599	0.000203734	0.0033115	0.000124245			0.0193436
	Results			40(a)/36(a)	± 2s	40(r)/39(k)	± 2s	Age	± 2s	MSWD
								(Ma)
	Inverse Isochron			296.174	4.21553	13.831	0.231737	72.6547	1.21211	0.0137778
					0.0142333		0.0167549		0.0166831
	Minimal External Error								1.89227
	Analytical Error								1.19313
	Statistics			Statistical F ratio	1.93842		Convergence	7.60029e-07
				Error Magnification	1		Number of Iterations	2
				Number of Data Points	10		Calculated Line	Unweighted York-2

## Sheet: Relative Abundances
	Relative Abundances			36Ar	%1s	37Ar	%1s	38Ar	%1s	39Ar	%1s	40Ar	%1s	Age	± 2s	40Ar(r)	39Ar(k)	K/Ca	± 2s
														(Ma)		(%)	(%)
	12M0396B	1.25		0.0353713	0.647013	6.33149	18.9265	0.00765464	1.08346	0.0397278	0.343748	11.1799	0.0332454	176.814	33.548	10.9434	1.72675	0.00239753	0.000915266
	12M0396C	1.5		0.00473328	1.01118	7.16501	11.0455	0.00266241	1.18458	0.143571	0.291528	3.05464	0.0540414	83.7795	4.93199	72.5708	6.77756	0.00831568	0.00183913
	12M0396D	2	4	0.00405985	1.13493	12.846	10.5182	0.00780244	0.804117	0.59461	0.22027	8.32179	0.115199	72.893	1.99653	97.659	28.6452	0.019603	0.00412529
	12M0396E	2.5	4	0.00413983	5.33188	15.003	16.1153	0.00813296	1.27617	0.59551	0.203211	8.13031	1.14833	72.5606	3.97123	99.3907	28.6155	0.0167673	0.00540559
	12M0396F	3	4	0.00817684	0.803501	15.3091	10.9274	0.00560964	1.35491	0.306147	0.296998	5.28509	0.350926	72.3199	4.88165	76.9544	14.4513	0.00829845	0.00181575
	12M0397B	3.5	4	0.0048306	1.91744	12.5253	10.1953	0.00300365	2.02613	0.139769	0.336514	2.26328	0.908994	72.8262	8.69618	80.2562	6.40834	0.00449778	0.000920176
	12M0397C	4.5	4	0.0123258	0.973557	10.6841	10.3046	0.0038485	1.26627	0.0982991	0.424482	4.05131	0.512404	72.0443	11.2993	30.7435	4.44285	0.00365565	0.000757222
	12M0397D	5.5	4	0.00701002	1.61316	4.35527	15.793	0.00199349	2.39832	0.0414051	0.820716	2.2801	0.915158	75.2095	18.2595	24.105	1.87635	0.00378739	0.00120226
	12M0397F	7	4	0.0111389	0.735353	2.88525	22.2369	0.00247651	1.56384	0.0292206	0.914737	3.45061	0.330595	74.302	21.9596	11.1564	1.33063	0.00405429	0.00181002
	12M0397G	8.5	4	0.0203835	0.690483	2.27257	30.2865	0.00435617	0.582496	0.0411732	0.705303	6.40941	0.168705	74.799	18.2901	8.79942	1.93622	0.00748993	0.00454194
	12M0397H	10	4	0.0239938	0.686371	0.679651	85.1594	0.00473405	0.904522	0.0229745	1.03525	7.35849	0.139401	75.0134	31.454	4.36917	1.10052	0.0142349	0.024252
	12M0397J	13	4	0.0496936	0.681588	1.68603	121.526	0.00975211	1.16227	0.0308198	0.681076	14.9694	0.139893	73.863	67.0638	2.7852	1.44985	0.00755961	0.0183886
	12M0398B	16	4	0.0348559	2.213	0.43057	90.2803	0.00666868	1.78107	0.0151619	0.483733	10.5278	1.91488	91.9813	210.056	2.48508	0.726899	0.0148413	0.0268034
	12M0398C	20		0.0747892	1.1732	-4.38404	74.6723	0.0147266	1.41988	0.0104702	2.08991	22.5847	0.892948	232.394	388.744	2.14513	0.512134	0.321452	15.0086
			S	0.295502	0.438473	87.7894	6.45722	0.0834219	0.400055	2.10886	0.106254	109.867	0.276915
	Information on Analysis and Constants Used in Calculations									Results		40(r)/39(k)	± 2s	Age	± 2s	MSWD	39Ar(k)	K/Ca	± 2s
														(Ma)			(%,n)
	Sample = VU91-G2				Age Equations = Conventional					Age Plateau		13.86	0.312393	72.8042	1.62246	0.0269607	90.9836	0.0046235	0.00152094
	Material = Groundmass (300-200)				Negative Intensities = Forced Zero								0.0225391		0.0222852		11
	Location = SO84 86DS-3				Decay Constant 40K = 5.543 ± 0.055 E-10 1/a					Minimal External Error					2.18003	2.22814	Statistical T Ratio
	Analyst = John OConnor				Decay Constant 39Ar = 2.940 ± 0.029 E-07 1/h					Analytical Error					1.60827	1	Error Magnification
	Project = VU91-WALVIS				Decay Constant 37Ar = 8.230 ± 0.082 E-04 1/h
	Mass Discrimination Law = LIN				No 36Cl Correction					Total Fusion Age		14.5567	0.655957	76.3871	3.37778		14	0.00953751	0.00117394
	Irradiation = VU91				No 36Cl Correction								0.0450622		0.0442192
	J = 0.00297118 ± 0.00000446									Minimal External Error					3.7072
	FC = 25.260 ± 0.020 Ma									Analytical Error					3.37032
	IGSN = Undefined
	Preferred Age = Undefined									Normal Isochron Error Chron		13.8146	0.0113574	72.5704	0.221258	> 100	90.2567
	Classification = Undefined												0.000822128		0.00304888		10
	Experiment Type = Undefined									Minimal External Error					1.46818	1.93842	Statistical F ratio
	Extraction Method = Undefined									Analytical Error					0.0584781	> 10	Error Magnification
	Heating = 224 sec
	Isolation = 912.00 min									Inverse Isochron		13.831	0.231737	72.6547	1.21211	0.0137778	90.2567
	Instrument = MAP215-50												0.0167549		0.0166831		10
	Lithology = Undefined									Minimal External Error					1.89227	1.93842	Statistical F ratio
	Lat-Lon = Undefined - Undefined									Analytical Error					1.19313	1	Error Magnification

## Sheet: Degassing Patterns
	Degassing Patterns			36Ar(a)	%1s	36Ar(c)	%1s	36Ar(ca)	%1s	36Ar(cl)	%1s	37Ar(ca)	%1s	38Ar(a)	%1s	38Ar(c)	%1s	38Ar(k)	%1s	38Ar(ca)	%1s	38Ar(cl)	%1s	39Ar(k)	%1s	39Ar(ca)	%1s	40Ar(r)	%1s	40Ar(a)	%1s	40Ar(c)	%1s	40Ar(k)	%1s
	12M0396B	1.25		0.0336935	1.17105	0	0	0.00167784	19.1565	0	0	6.33149	18.9265	0.00629731	1.20178	0	0	0.000402127	2.49051	6.99629e-05	37.6525	0.000885242	13.0764	0.0353021	2.47583	0.00442571	19.5061	1.22346	9.64662	9.95642	1.18481	0	0	6.46029e-05	58.7522
	12M0396C	1.5		0.00283455	7.84382	0	0	0.00189873	11.4353	0	0	7.16501	11.0455	0.000529778	7.84847	0	0	0.00157837	0.593837	7.91733e-05	34.373	0.000475092	12.5447	0.138563	0.528907	0.00500834	12.0118	2.21678	2.96551	0.83761	7.84589	0	0	0.00025357	58.7024
	12M0396D	2	4	0.000655651	57.1664	0	0	0.0034042	10.9268	0	0	12.846	10.5182	0.000122541	57.167	0	0	0.00667092	0.392639	0.000141949	34.2072	0.000867032	12.5751	0.585631	0.28507	0.00897938	11.5287	8.12698	1.36796	0.193745	57.1667	0	0	0.0010717	58.7007
	12M0396E	2.5	4	0.000164026	419.332	0	0	0.00397581	16.3849	0	0	15.003	16.1153	3.06564e-05	419.332	0	0	0.006664	0.454204	0.000165784	36.3209	0.00127252	14.0224	0.585023	0.365242	0.0104871	16.7923	8.08077	2.7679	0.0484696	419.332	0	0	0.00107059	58.7011
	12M0396F	3	4	0.00411993	11.2616	0	0	0.00405691	11.3212	0	0	15.3091	10.9274	0.000770014	11.2648	0	0	0.00336543	0.594551	0.000169166	34.3353	0.00130503	10.0129	0.295446	0.529709	0.0107011	11.9033	4.06711	3.40215	1.21744	11.263	0	0	0.000540667	58.7024
	12M0397B	3.5	4	0.0015114	24.1067	0	0	0.00331921	10.6163	0	0	12.5253	10.1953	0.00028248	24.1082	0	0	0.00149238	0.874908	0.000138405	34.1093	0.00109039	9.50457	0.131014	0.832205	0.00875519	11.2349	1.81642	6.03471	0.446618	24.1073	0	0	0.000239756	58.7059
	12M0397C	4.5	4	0.00949452	3.43787	0	0	0.00283129	10.7213	0	0	10.6841	10.3046	0.00177453	3.44846	0	0	0.00103466	1.07349	0.000118059	34.1422	0.000921254	9.62815	0.0908309	1.03898	0.00746818	11.3342	1.24552	7.9318	2.80563	3.44258	0	0	0.000166221	58.7092
	12M0397D	5.5	4	0.00585587	3.70922	0	0	0.00115415	16.068	0	0	4.35527	15.793	0.00109446	3.71903	0	0	0.000436967	1.60275	4.81258e-05	36.179	0.000413935	15.8321	0.0383607	1.57985	0.00304434	16.4832	0.549616	12.2928	1.73041	3.71358	0	0	7.02001e-05	58.7213
	12M0397F	7	4	0.0103743	1.83218	0	0	0.000764591	22.433	0	0	2.88525	22.2369	0.00193895	1.85197	0	0	0.000309879	1.96939	3.1882e-05	39.4206	0.000195802	27.9011	0.0272038	1.9508	0.00201679	22.7323	0.384964	14.957	3.06559	1.841	0	0	4.9783e-05	58.7324
	12M0397G	8.5	4	0.0197812	1.16814	0	0	0.000602231	30.4308	0	0	2.27257	30.2865	0.00369711	1.19894	0	0	0.000450908	1.45744	2.51119e-05	44.4609	0.000183045	28.7868	0.0395846	1.43221	0.00158853	30.652	0.563991	12.3989	5.84535	1.18193	0	0	7.24399e-05	58.7175
	12M0397H	10	4	0.0238137	0.945302	0	0	0.000180108	85.2108	0	0	0.679651	85.1594	0.00445078	0.983105	0	0	0.000256291	2.10562	7.51015e-06	91.1681	1.94678e-05	317.652	0.0224995	2.08824	0.000475076	85.2901	0.321505	21.3024	7.03694	0.962287	0	0	4.1174e-05	58.7371
	12M0397J	13	4	0.0492468	1.29977	0	0	0.000446798	121.562	0	0	1.68603	121.526	0.00920423	1.32751	0	0	0.000337643	4.89455	1.86306e-05	125.81	0.000191613	88.2582	0.0296413	4.8871	0.00117854	121.618	0.416927	46.0746	14.5524	1.31217	0	0	5.42435e-05	58.9031
	12M0398B	16	4	0.0347418	2.24	0	0	0.000114101	90.3289	0	0	0.43057	90.2803	0.00649324	2.25622	0	0	0.000169281	1.91536	4.7578e-06	95.969	1.40054e-06	13472.2	0.014861	1.89623	0.000300968	90.4036	0.261626	117.104	10.2662	2.24723	0	0	2.71955e-05	58.7306
	12M0398C	20		0.0747892	1.64981	0	0	0	0.00086752	0	0	0	3.27366	0.0139781	1.67176	0	0	0.000119266	21.9566	0	3.6174e-05	0.000629239	50.3369	0.0104702	21.9549	0	0.00228829	0.484472	86.3957	22.1002	1.6596	0	0	1.91605e-05	62.6714
			S	0.271076	0.737655	0	0	0.024426	6.23527	0	0	92.1734	6.1501	0.0506642	0.745401	0	0	0.0232881	0.258091	0.00101852	12.8602	0.00845106	6.20256	2.04443	0.228565	0.0644292	6.36443	29.7601	2.24149	80.1031	0.741108	0	0	0.00374131	26.0621
			S							0.295502	0.85061	92.1734	6.1501									0.0834219	0.793478			2.10886	0.2948							109.867	0.812778

## Sheet: Additional Parameters
	Additional Parameters			40(r)/39(k)	1s	40(r+a)	1s	40Ar/39Ar	1s	37Ar/39Ar	1s	36Ar/39Ar	1s	Time (days)	37Ar (decay)	39Ar (decay)	40Ar (moles)
	12M0396B	1.25		34.6569	3.45157	11.1799	0.00371701	281.413	0.971866	159.372	30.1684	0.890341	0.00652316	487.316	15220.5	1.00345	3.68938e-17
	12M0396C	1.5		15.9984	0.481921	3.05439	0.00165747	21.2762	0.0630828	49.9057	5.51427	0.0329682	0.000346948	487.364	15234.9	1.00345	1.00803e-17
	12M0396D	2	4	13.8773	0.193914	8.32072	0.00960724	13.9954	0.0347891	21.6041	2.27287	0.00682776	7.89365e-05	487.415	15250.4	1.00345	2.74619e-17
	12M0396E	2.5	4	13.8127	0.385636	8.12924	0.0933647	13.6527	0.159213	25.1936	4.06036	0.00695174	0.000370928	487.465	15265.5	1.00345	2.683e-17
	12M0396F	3	4	13.766	0.473983	5.28455	0.0185495	17.2632	0.0793652	50.0057	5.46636	0.0267088	0.000228797	487.558	15293.3	1.00345	1.74408e-17
	12M0397B	3.5	4	13.8643	0.84459	2.26304	0.0205735	16.193	0.156956	89.6142	9.14143	0.0345613	0.000672819	488.124	15465.5	1.00345	7.46882e-18
	12M0397C	4.5	4	13.7125	1.09694	4.05115	0.0207593	41.2142	0.274234	108.69	11.2096	0.125391	0.00133174	488.175	15481	1.00345	1.33693e-17
	12M0397D	5.5	4	14.3276	1.77574	2.28003	0.0208665	55.068	0.676931	105.187	16.6346	0.169303	0.00306428	488.242	15501.6	1.00345	7.52431e-18
	12M0397F	7	4	14.1511	2.13451	3.45056	0.0114076	118.088	1.14858	98.7403	21.9753	0.381199	0.00447399	488.33	15528.4	1.00345	1.1387e-17
	12M0397G	8.5	4	14.2477	1.77831	6.40934	0.0108131	155.67	1.12892	55.1954	16.7213	0.495067	0.00488643	488.376	15542.7	1.00345	2.11511e-17
	12M0397H	10	4	14.2894	3.05858	7.35845	0.0102578	320.289	3.34571	29.5828	25.1944	1.04436	0.0129722	488.429	15558.9	1.00345	2.4283e-17
	12M0397J	13	4	14.0658	6.51711	14.9694	0.0209412	485.708	3.3771	54.7061	66.4832	1.61239	0.0155362	488.527	15589	1.00345	4.93991e-17
	12M0398B	16	4	17.6049	20.6188	10.5278	0.201596	694.361	13.7139	28.3981	25.6383	2.29891	0.0520762	489.128	15775.3	1.00346	3.47419e-17
	12M0398C	20		46.2714	41.2471	22.5847	0.20167	2157.04	49.0227	-418.715	312.786	7.14304	0.171197	489.173	15789.1	1.00346	7.45295e-17

## Sheet: Procedure Blanks
	Procedure Blanks		36Ar	1s	37Ar	1s	38Ar	1s	39Ar	1s	40Ar	1s
	12M0396B	1.25	0.00221653	1.94447e-05	0.000409145	1.18673e-05	0.000509898	1.33492e-05	0.000621244	3.2858e-05	0.608373	0.000516303
	12M0396C	1.5	0.00221653	1.94447e-05	0.000409145	9.86172e-06	0.000509898	1.29645e-05	0.000621244	2.67243e-05	0.608373	0.000516303
	12M0396D	2	0.00221653	1.94447e-05	0.000409145	9.86172e-06	0.000509898	1.29645e-05	0.000621244	2.67243e-05	0.608373	0.000516303
	12M0396E	2.5	0.00205816	0.000223969	0.000500383	0.00012903	0.000471769	5.39226e-05	0.000725603	0.000147586	0.542587	0.0930345
	12M0396F	3	0.00185072	1.77813e-05	0.000578763	4.67839e-05	0.000434937	1.53067e-05	0.000675456	0.000199059	0.471019	0.0180589
	12M0397B	3.5	0.00133761	8.62512e-05	0.000480759	1.21629e-05	0.000315447	3.87393e-05	0.000375148	0.000295352	0.35129	0.0204036
	12M0397C	4.5	0.00133761	8.62512e-05	0.000480759	1.21629e-05	0.000315447	3.87393e-05	0.000375148	0.000295352	0.35129	0.0204036
	12M0397D	5.5	0.00133761	8.62512e-05	0.000480759	1.21629e-05	0.000315447	3.87393e-05	0.000375148	0.000295352	0.35129	0.0204036
	12M0397F	7	0.00138554	1.84665e-05	0.000461431	2.98125e-05	0.000332125	1.5154e-05	0.000428128	0.000220427	0.358861	0.00969662
	12M0397G	8.5	0.00138554	1.84665e-05	0.000461431	2.98125e-05	0.000332125	1.5154e-05	0.000428128	0.000220427	0.358861	0.00969662
	12M0397H	10	0.00138554	1.84665e-05	0.000461431	2.98125e-05	0.000332125	1.5154e-05	0.000428128	0.000220427	0.358861	0.00969662
	12M0397J	13	0.00143314	8.57829e-05	0.000461932	3.05206e-05	0.000340759	2.73653e-05	0.00033637	9.06623e-05	0.366216	0.0200979
	12M0398B	16	0.00178951	0.000763036	0.000438273	1.67826e-05	0.000340061	0.000110687	0.000310062	4.71461e-05	0.477355	0.201567
	12M0398C	20	0.00178951	0.000763036	0.000438273	1.67826e-05	0.000340061	0.000110687	0.000310062	4.71461e-05	0.477355	0.201567

## Sheet: Intercept Values
	Intercept Values		36Ar	1s	r2			37Ar	1s	r2			38Ar	1s	r2			39Ar	1s	r2			40Ar	1s	r2
	12M0396B	1.25	0.00387889	9.96162e-06	0.923098	LIN	183 of 192	8.35721e-05	6.8456e-06	0.181806	LIN	142 of 144	0.000829464	7.99979e-06	0.52556	LIN	182 of 192	0.00405485	1.19091e-05	0.986152	PAR	179 of 192	1.17883	0.000368078	0.998672	EXP	153 of 192
	12M0396C	1.5	0.00711054	3.53936e-05	0.756765	PAR	164 of 192	0.000891422	2.40484e-05	0.570692	LIN	106 of 144	0.00321756	2.82106e-05	0.735145	LIN	184 of 192	0.144913	0.00035992	0.953109	EXP	124 of 192	3.66302	0.00156795	0.997493	LIN	139 of 192
	12M0396D	2	0.00641424	3.59117e-05	0.841093	PAR	#	0.00127293	3.49293e-05	0.844037	PAR	# 1	0.00844496	5.78465e-05	0.913336	EXP	#	0.598216	0.000964948	0.998599	EXP	# 1	8.93017	0.00957271	0.998977	EXP	# 1
	12M0396E	2.5	0.00633857	3.60446e-05	0.862203	PAR	#	0.00150822	1.68575e-05	0.97483	PAR	# 8 9 11	0.00874297	8.73433e-05	0.796518	EXP	#	0.599225	0.000808772	0.999449	EXP	# 2 3 4 5	8.6729	0.00781919	0.999622	PAR	# 1 2 3
	12M0396F	3	0.0103052	4.30907e-05	0.985578	PAR	#	0.00160528	2.43055e-05	0.943168	PAR	# 11 12	0.00613992	7.38421e-05	0.812366	EXP	#	0.308359	0.000763627	0.997641	PAR	# 2 3 4	5.75611	0.00422606	0.999793	PAR	# 1 2 3 4
	12M0397B	3.5	0.00633224	2.96686e-05	0.976199	LIN	#	0.00131127	2.42876e-05	0.885875	PAR	# 12	0.00337015	4.74065e-05	0.838899	EXP	#	0.140845	0.000303255	0.997694	PAR	# 2 3 4	2.61457	0.00263524	0.99939	PAR	# 1 2 3 6
	12M0397C	4.5	0.014082	4.90573e-05	0.994643	PAR	# 2	0.00118848	2.23407e-05	0.869015	PAR	# 5	0.00422936	2.8636e-05	0.971534	EXP	#	0.0991671	0.000258336	0.991893	PAR	# 1 2 4	4.4026	0.00382544	0.99959	PAR	# 1 2 3
	12M0397D	5.5	0.00858566	6.66111e-05	0.96985	PAR	# 1	0.00076887	3.38827e-05	0.444064	LIN	#	0.00234282	2.87591e-05	0.959661	EXP	#	0.0419878	0.000159752	0.528513	LIN	# 1 2 3	2.63139	0.00437079	0.998076	PAR	# 1 2 5
	12M0397F	7	0.0129026	4.79624e-05	0.991738	LIN	#	0.000651967	2.38235e-05	0.659801	LIN	#	0.00285073	3.55747e-05	0.952721	EXP	#	0.0297952	0.000147108	0.985316	EXP	# 1 2 3	3.80947	0.00600897	0.997243	PAR	#
	12M0397G	8.5	0.0224611	7.52496e-05	0.993428	LIN	#	0.000611369	3.10405e-05	0.43592	LIN	#	0.00476234	1.62066e-05	0.994302	EXP	#	0.0418077	0.000180967	0.990912	LIN	# 1 2 3	6.76828	0.00478501	0.999588	EXP	# 1
	12M0397H	10	0.0261941	8.73445e-05	0.995339	PAR	# 2	0.000506226	2.34025e-05	0.195723	LIN	# 1	0.00514663	3.82327e-05	0.969491	EXP	#	0.0235178	8.57582e-05	0.999094	EXP	# 1	7.71735	0.00334634	0.999884	EXP	# 1 2
	12M0397J	13	0.00528141	1.58434e-05	0.996944	PAR	# 2 3	5.72841e-05	1.30844e-05	0.0876613	PAR	#	0.00102586	1.08021e-05	0.872065	EXP	#	0.00313106	1.84749e-05	0.998526	EXP	#	1.53356	0.000588274	0.999868	EXP	#
	12M0398B	16	0.0378289	9.74683e-05	0.996161	LIN	#	0.000466262	1.86952e-05	0.29122	PAR	#	0.00712208	4.39582e-05	0.970608	EXP	#	0.0155479	5.1863e-05	0.999836	EXP	#	11.0052	0.00340706	0.999912	EXP	#
	12M0398C	20	0.00791183	1.91183e-05	0.996586	LIN	#	1.53541e-05	2.10154e-05	0.0307374	LIN	#	0.0015317	1.76028e-05	0.862519	EXP	#	0.00108327	2.14222e-05	0.999357	EXP	#	2.30621	0.000642632	0.999932	EXP	#

## Sheet: Sample Parameters
	Sample Parameters		Sample	Material	Location	Analyst	Temp	Standard	%1s	J	%1s	MDF	%1s	Volume Ratio	Sensitivity	Day	Month	Year	Hour	Min	Resist	Irradiation	Project	Experiment	Nmb	Standard Name
								(in Ma)							(mol/volt)
	12M0396B	1.25	VU91-G2	Groundmass (300-200)	SO84 86DS-3	John OConnor	1.25	25.26	0.08	0.00297118	0.15	1.0085	0.15	1	3.3e-18	14	NOV	2012	13	50	10	VU91	VU91-Walvis	Ewing Seamount	1	FC
	12M0396C	1.5	VU91-G2	groundmass	SO84 86DS-3	John OConnor	1.5	25.26	0.08	0.00297118	0.15	1.0085	0.15	1	3.3e-18	14	NOV	2012	14	59	1	VU91	VU91-Walvis	Ewing Seamount	1	FC
	12M0396D	2	VU91-G2	Groundmass (300-200)	SO84 86DS-3	John O'Connor	2	25.26	0.6	0.00297118	0.15	1.0085	0.15	1	3.3e-18	14	NOV	2012	16	13	1	VU91	VU91-Walvis	Ewing Seamount	1	DRA-1
	12M0396E	2.5	VU91-G2	Groundmass (300-200)	SO84 86DS-3	John O'Connor	2.5	25.26	0.6	0.00297118	0.15	1.0085	0.15	1	3.3e-18	14	NOV	2012	17	25	1	VU91	VU91-Walvis	Ewing Seamount	1	DRA-1
	12M0396F	3	VU91-G2	Groundmass (300-200)	SO84 86DS-3	John O'Connor	3	25.26	0.6	0.00297118	0.15	1.0085	0.15	1	3.3e-18	14	NOV	2012	19	38	1	VU91	VU91-Walvis	Ewing Seamount	1	DRA-1
	12M0397B	3.5	VU91-G2	Groundmass (300-200)	SO84 86DS-3	John O'Connor	3.5	25.26	0.6	0.00297118	0.15	1.0085	0.15	1	3.3e-18	15	NOV	2012	9	14	1	VU91	VU91-Walvis	Ewing Seamount	1	DRA-1
	12M0397C	4.5	VU91-G2	Groundmass (300-200)	SO84 86DS-3	John O'Connor	4.5	25.26	0.6	0.00297118	0.15	1.0085	0.15	1	3.3e-18	15	NOV	2012	10	27	1	VU91	VU91-Walvis	Ewing Seamount	1	DRA-1
	12M0397D	5.5	VU91-G2	Groundmass (300-200)	SO84 86DS-3	John O'Connor	5.5	25.26	0.6	0.00297118	0.15	1.0085	0.15	1	3.3e-18	15	NOV	2012	12	4	1	VU91	VU91-Walvis	Ewing Seamount	1	DRA-1
	12M0397F	7	VU91-G2	Groundmass (300-200)	SO84 86DS-3	John O'Connor	7	25.26	0.6	0.00297118	0.15	1.0085	0.15	1	3.3e-18	15	NOV	2012	14	10	1	VU91	VU91-Walvis	Ewing Seamount	1	DRA-1
	12M0397G	8.5	VU91-G2	Groundmass (300-200)	SO84 86DS-3	John O'Connor	8.5	25.26	0.6	0.00297118	0.15	1.0085	0.15	1	3.3e-18	15	NOV	2012	15	17	1	VU91	VU91-Walvis	Ewing Seamount	1	DRA-1
	12M0397H	10	VU91-G2	Groundmass (300-200)	SO84 86DS-3	John O'Connor	10	25.26	0.6	0.00297118	0.15	1.0085	0.15	1	3.3e-18	15	NOV	2012	16	33	1	VU91	VU91-Walvis	Ewing Seamount	1	DRA-1
	12M0397J	13	VU91-G2	Groundmass (300-200)	SO84 86DS-3	John O'Connor	13	25.26	0.6	0.00297118	0.15	1.0085	0.15	1	3.3e-18	15	NOV	2012	18	54	10	VU91	VU91-Walvis	Ewing Seamount	1	DRA-1
	12M0398B	16	VU91-G2	Groundmass (300-200)	SO84 86DS-3	John O'Connor	16	25.26	0.6	0.00297118	0.15	1.0085	0.15	1	3.3e-18	16	NOV	2012	9	20	1	VU91	VU91-Walvis	Ewing Seamount	1	DRA-1
	12M0398C	20	VU91-G2	Groundmass (300-200)	SO84 86DS-3	John O'Connor	20	25.26	0.6	0.00297118	0.15	1.0085	0.15	1	3.3e-18	16	NOV	2012	10	24	10	VU91	VU91-Walvis	Ewing Seamount	1	DRA-1

[truncated: 6 more sheets: Irradiation Constants, Age Plateau, K-Ca Plateau, Normal Isochron, Inverse Isochron, Sheet1]
